# Supplementary material for: Preliminary evaluation of a novel nine-biomarker profile for the prediction of autism spectrum disorder
Source: PLOS journal article supplement (doi:10.1371/journal.pone.0227626), 2020-01-16
Supplement: S1 (10.1371/journal.pone.0227626.s001) [file journal.pone.0227626.s001]

## Sheet: Data
ID	Age	CARS	K	Na	LDH	GLTN	GST	CK	Q10	Cas7	MLTN	K/Na	GST/GLTN	CK/Cas7	Q10/Cas7	Cas7/MLTN	Groups			K	Na	LDH	GLTN	GST	CK	CoQ10	Cas7	MLTN	K:Na	GST: GLTN	CK: Cas7	CoQ10: Cas7	Cas7: MLTN
C1	5		39.8469	148.991	131.84	22.25	8.125	13.332	20.986	81.05	792.632	0.267445	2.73846	0.164491	0.258927	0.102254	Control		Control	31.4577	152.309	200.287	31.9667	6.75347	23.331	20.799	76.5587	786.619	0.228443	4.93322	0.30475	0.28021	0.0982808
C4	4		29.5694	156.697	553.728	24.75	8.75	9.999	48.19	69.42	869.389	0.188704	2.82857	0.144036	0.69418	0.0798492	Control		ASD	25.5017	203.954	310.331	12.3077	12.6767	34.8683	32.2491	343.689	850.023	0.140266	1.06019	0.104758	0.0958142	0.404668
C6	7		35.4067	163.119	138.432	59.5	6.35417	13.332	15.861	72.51	832.546	0.21706	9.36393	0.183864	0.218742	0.0870943	Control		Control	4.47875	45.2648	121.82	21.7907	2.35595	16.7373	14.5859	6.84194	80.5152	0.0939759	3.24405	0.217717	0.20748	0.0132429
C9	7		38.7177	154.128	151.616	16.5	6.25	53.328	2.26	82.67	826.405	0.251204	2.64	0.645071	0.0273376	0.100036	Control		ASD	5.08351	67.3462	120.186	5.06844	5.74981	12.2927	12.1845	45.9996	39.6647	0.0610915	0.479033	0.0435057	0.0396674	0.052898
C10	5		25.4545	159.266	487.808	28.5	9.47917	16.665	20.729	70.81	675.96	0.159824	3.00659	0.235348	0.292741	0.104755	Control		Control	0.91422	9.23965	24.8664	4.44801	0.480907	3.41649	2.97733	1.39661	16.4351	0.0191827	0.662189	0.0444413	0.0423516	0.00270319
C15	9		38.7368	131.009	79.104	15.75	5.625	16.665	28.185	81.21	835.616	0.29568	2.8	0.205209	0.347063	0.0971858	Control		ASD	1.40991	18.6785	33.3336	1.40573	1.59471	3.40937	3.37938	12.758	11.001	0.0169437	0.13286	0.0120663	0.0110018	0.0146713
C16	7		29.3014	161.835	98.88	60.25	6.875	9.999	12.062	84.32	718.945	0.181058	8.76364	0.118584	0.14305	0.117283	Control			0.000770553	0.00859821	0.0124445	0.0030215	8.49822e-05	0.035966	0.0214605	1.16593e-25	0.0117789	0.00442992	0.000149439	0.00250601	0.00330257	4.24697e-25
C19	9		32.3828	209.358	105.472	64.25	5.41667	9.999	44.989	79.31	881.67	0.154677	11.8615	0.126075	0.567255	0.0899543	Control
C25	6		28.3445	125.872	284.774	8	1.66667	19.998	9.382	86.01	777.28	0.225186	4.8	0.232508	0.10908	0.110655	Control
C29	9		25.6842	127.156	164.8	22.5	3.02083	13.332	14.439	69.79	795.702	0.20199	7.44828	0.19103	0.206892	0.0877087	Control
C34	8		31.2919	240.183	125.248	4.75	4.89583	13.332	31.748	86.41	841.757	0.130283	0.970213	0.154288	0.367411	0.102654	Control
C35	5		30.1244	181.101	290.048	7.5	1.45833	16.665	6.624	87.73	636.047	0.16634	5.14286	0.189958	0.0755044	0.13793	Control
C36	6		27.4067	119.45	224.128	14.25	8.33333	49.995	30.996	66.3	583.851	0.229442	1.71	0.754072	0.467511	0.113556	Control
C37	7		26.3923	140	276.864	24.25	7.60417	53.328	4.103	82.09	829.475	0.188517	3.18904	0.649628	0.0499817	0.0989662	Control
C38	7		34.7751	152.844	98.88	4.25	6.5625	39.996	20.986	83.34	807.983	0.22752	0.647619	0.479914	0.251812	0.103146	Control
C39	5		31.1388	131.009	270.272	8.25	6.97917	23.331	48.19	72.27	792.632	0.237684	1.18209	0.322831	0.666805	0.0911772	Control
C43	5		28.9378	151.56	171.392	9.75	7.08333	59.994	15.861	77.98	869.389	0.190933	1.37647	0.769351	0.203398	0.0896952	Control
C46	11		34.4115	75.7798	158.208	54.75	10.4167	13.332	2.26	79.18	832.546	0.454098	5.256	0.168376	0.0285426	0.0951059	Control
C47	8		38.3923	74.4954	230.72	56.35	9.16667	9.999	20.729	68.65	826.405	0.515365	6.14727	0.145652	0.301952	0.0830706	Control
C49	7		31.1388	245.321	224.128	55.3	8.33333	43.329	28.185	74.08	675.96	0.126931	6.636	0.584895	0.380467	0.109592	Control
C50	5		24.4785	71.9266	13.184	54.15	8.22917	6.666	12.062	75.22	835.616	0.340326	6.58025	0.08862	0.160356	0.0900174	Control
C51	2		28.134	138.716	224.128	50.85	4.375	6.666	44.989	65.22	718.945	0.202818	11.6229	0.102208	0.689804	0.0907163	Control
C52	9		31.5789	208.073	131.84	38.4	8.22917	23.331	5.978	70.38	881.67	0.151768	4.66633	0.3315	0.0849389	0.0798258	Control
C54	5		33.3397	187.523	171.392	62.15	8.85417	23.331	9.382	71.46	740.437	0.17779	7.01929	0.32649	0.13129	0.0965106	Control
A1	5	44	28.5933	147.71	257.088	23	30.2083	36.663	33.852	359.02	847.897	0.193577	0.761379	0.10212	0.09429	0.423424	ASD
A4	4	42	25.512	148.99	217.536	9.25	10.11	6.666	22.011	366.35	847.897	0.171233	0.914936	0.0181957	0.0600819	0.432069	ASD
A19	9	49	31.0813	175.96	138.432	6	18.2292	29.997	22.296	372.14	838.686	0.176639	0.329143	0.0806068	0.0599129	0.443718	ASD
A22	9	35	27.9426	166.97	257.088	11.5	11.6667	33.33	16.94	386.34	817.194	0.167351	0.985714	0.0862712	0.0438474	0.472764	ASD
A29	9	40	28.7081	124.59	415.296	6.25	11.875	46.662	19.039	349.47	940.006	0.230421	0.526316	0.133522	0.0544796	0.371774	ASD
A34		30	31.2919	125.87	520.768	7	11.9792	26.664	44.912	339.55	823.335	0.248605	0.584348	0.0785275	0.132269	0.412408	ASD
A36	6	35	13.6651	208.07	257.088	19.75	9.0625	39.996	25.772	305.41	844.827	0.0656754	2.17931	0.130958	0.0843849	0.361506	ASD
A37	7	36	20.6507	200.37	382.336	14.5	10.4167	49.995	49.906	279.38	887.811	0.103063	1.392	0.17895	0.178631	0.314684	ASD
A39	5	33	25.4928	351.03	395.52	12.25	9.89583	43.329	42.16	438.06	912.373	0.0726229	1.23789	0.0989111	0.0962425	0.480133	ASD
A46	11	32	26.3541	224.77	171.392	16.25	11.25	19.998	52.5	376.9	814.124	0.117249	1.44444	0.0530592	0.139294	0.462952	ASD
A47	8	41	26.3158	282.57	197.76	10.75	10.7292	43.329	39.025	294.79	817.194	0.0931302	1.00194	0.146983	0.132382	0.360734	ASD
A50	5	30	18.3923	218.35	355.968	11.25	9.375	29.997	26.902	290.44	841.757	0.0842333	1.2	0.103281	0.092625	0.34504	ASD
A51	1.6	38.5	27.5215	276.15	468.032	12.25	10	46.662	23.923	310.11	817.194	0.0996615	1.225	0.150469	0.0771436	0.379481	ASD
			0.000770553	0.00859821	0.0124445	0.0030215	8.49822e-05	0.035966	0.0214605	1.16593e-25	0.0117789	0.00442992	0.000149439	0.00250601	0.00330257	4.24697e-25
